# Supplementary material for: Blackcurrant (Ribes nigrum L.) Seeds—A Valuable Byproduct for Further Processing
Source: MDPI journal article supplement (doi:10.3390/molecules27248679), 2022-12-08
Supplement: s1 [file s1]

# Blackcurrant (*Ribes nigrum* L.) Seeds – A Valuable Byproduct for Further Processing

Magdalena Wójciak <sup>1,\*</sup>, Barbara Mazurek<sup>2</sup>, Katarzyna Tyśkiewicz<sup>2</sup>, Małgorzata Kondracka<sup>2</sup>, Grażyna Wójcicka<sup>3</sup>, Tomasz Blicharski<sup>4</sup> and Ireneusz Sowa<sup>1</sup>

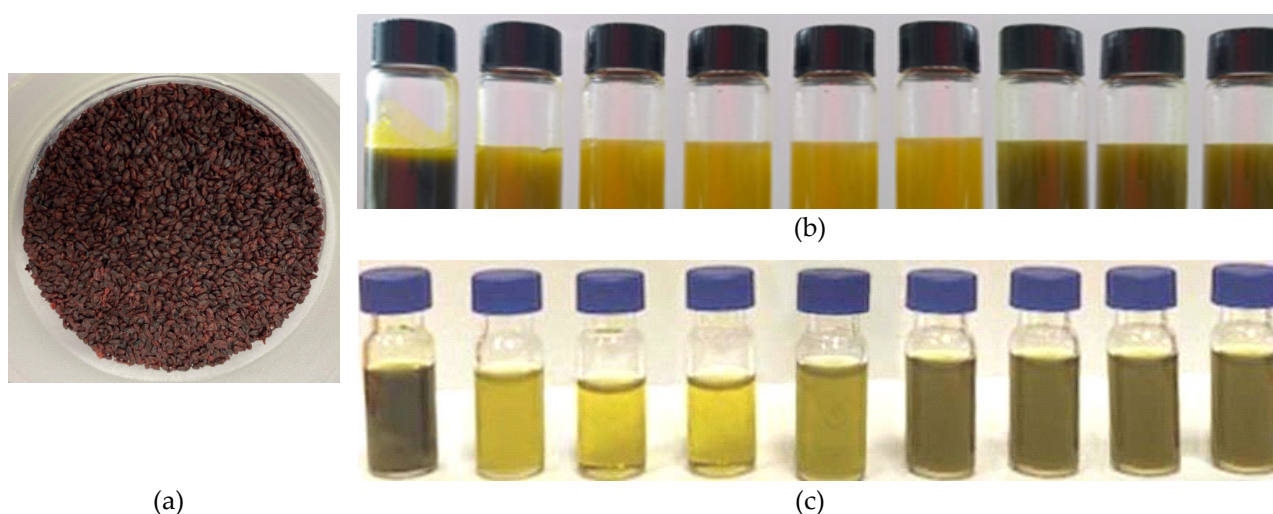

**Figure S1.** Blackcurrant seeds (a) and the example of samples of blackcurrant oil fractions obtained using CO<sub>2</sub> at pressure of 230 bar (b) and pressure of 330 bar (c).

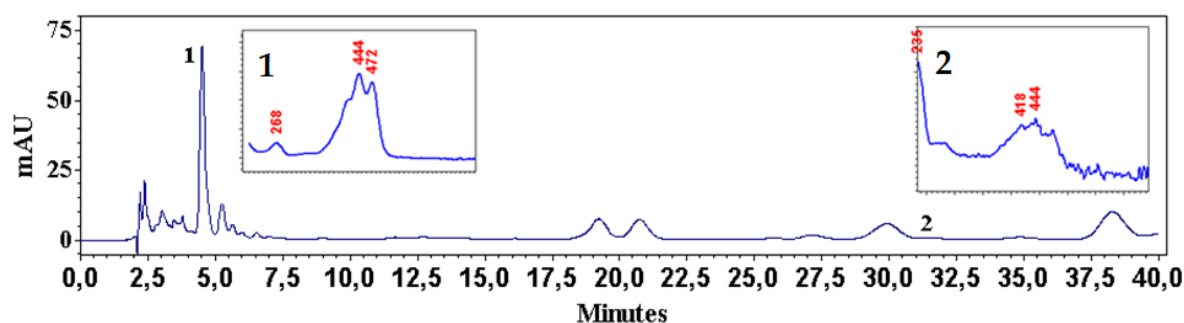

**Figure S2.** Chromatogram of oil sample obtained using CO<sub>2</sub> at pressure 230 bar (fraction F1) and representative UV-Vis spectra of identified compounds. 1- lutein, 2-  $\beta$ -carotene

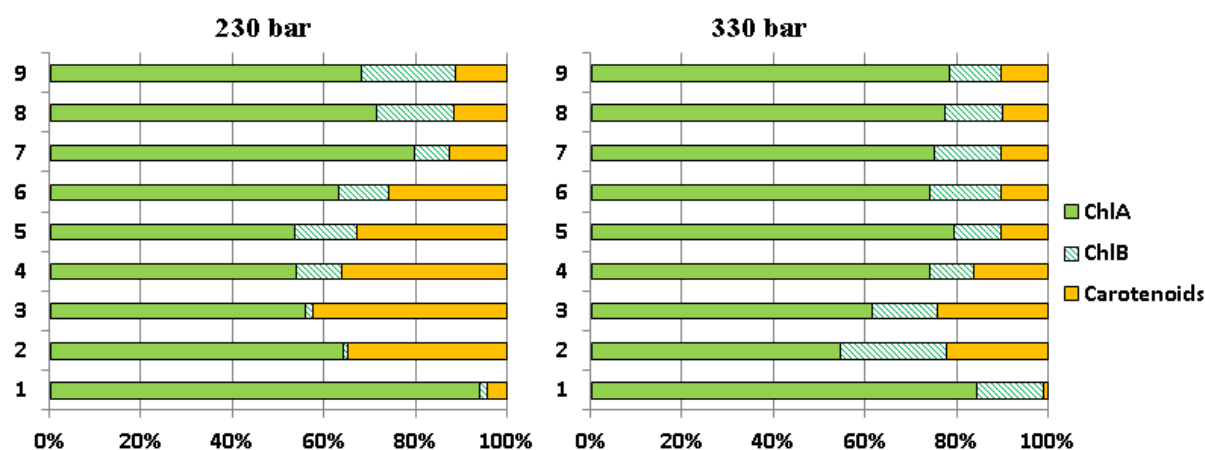

Figure S3. Percent distribution of pigments in oil fractions obtained using CO<sub>2</sub> at pressure of 230 and 330 bar.

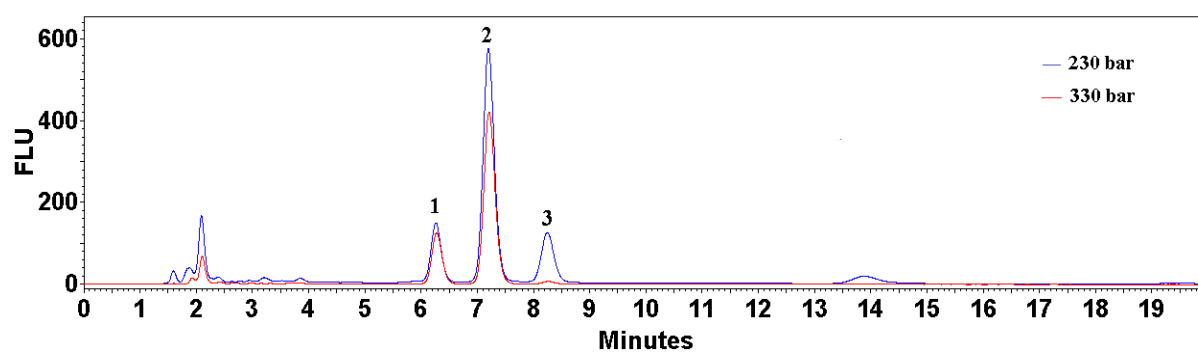

Figure S4. FL-chromatogram of fraction F1 the oil obtained using CO<sub>2</sub> at pressure 230 bar 1-  $\delta$  tocopherol, 2-  $\gamma$  tocopherol, 3-  $\alpha$  tocopherol

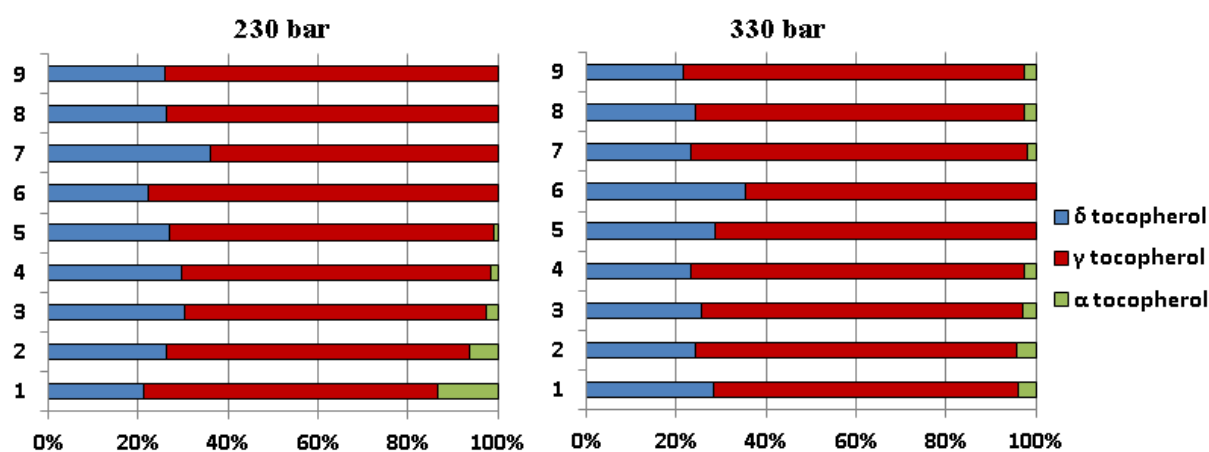

Figure S5. Percent distribution of tocopherols in oil fractions obtained using CO<sub>2</sub> at pressure of 230 and 330 bar.

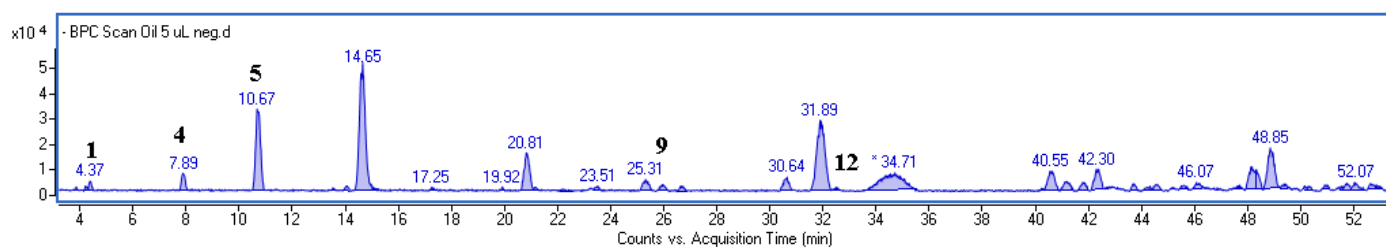

**Figure S6.** BPC chromatogram of oil sample obtained using CO<sub>2</sub> at pressure 230 bar (fraction F1). Numbering of components as in Table 3.

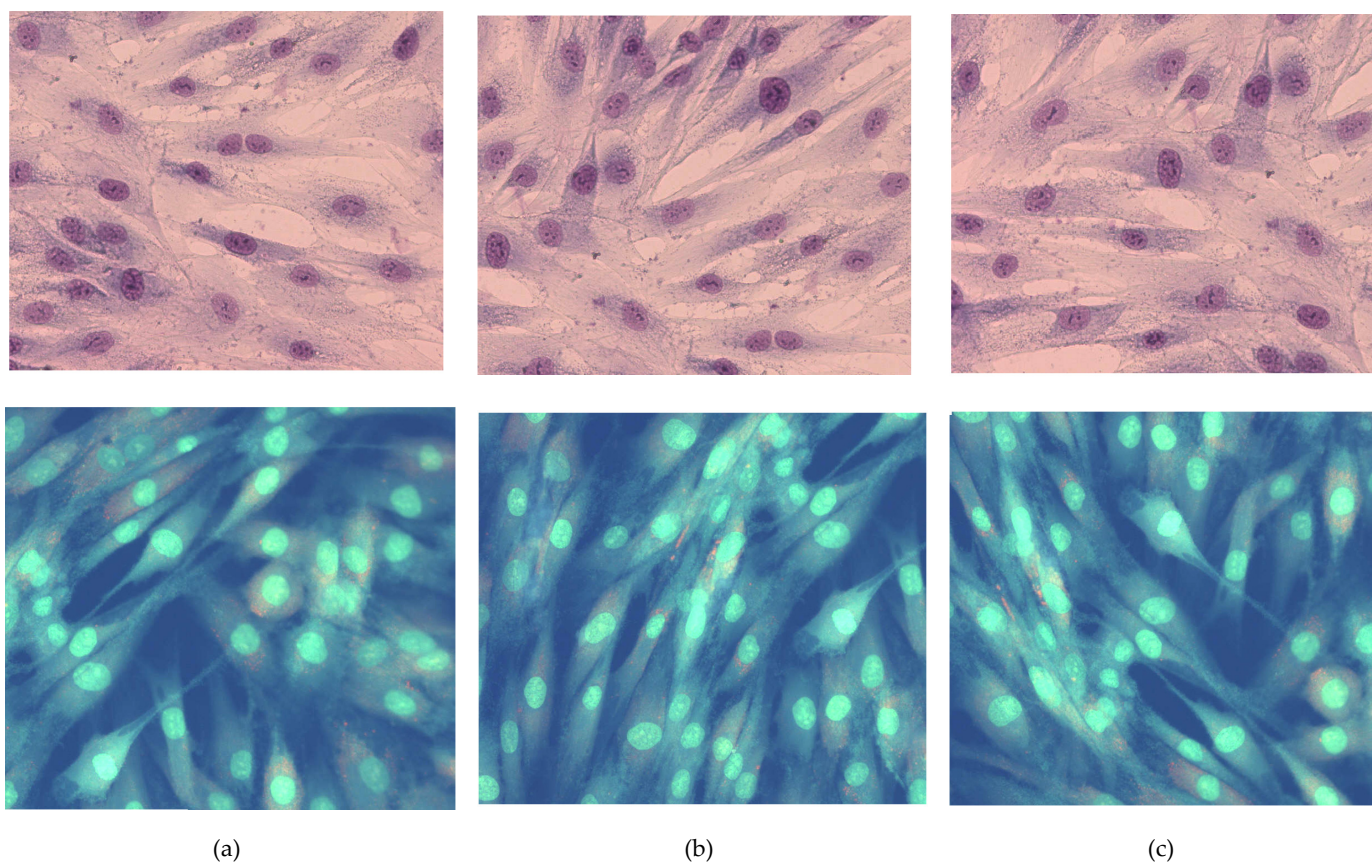

**Figure S7.** Image of human skin fibroblasts (HSF) cells: (a) control, (b) after 24-hour incubation with water/1,3-propanediol mixture (8/2 v/v) at a dilution of 1/80, (c) after 24-hour incubation with water/1,3-propanediol mixture (6/4 v/v) at a dilution of 1/80. May Grunwald-Giemsa and acridine orange staining (200x magnification).

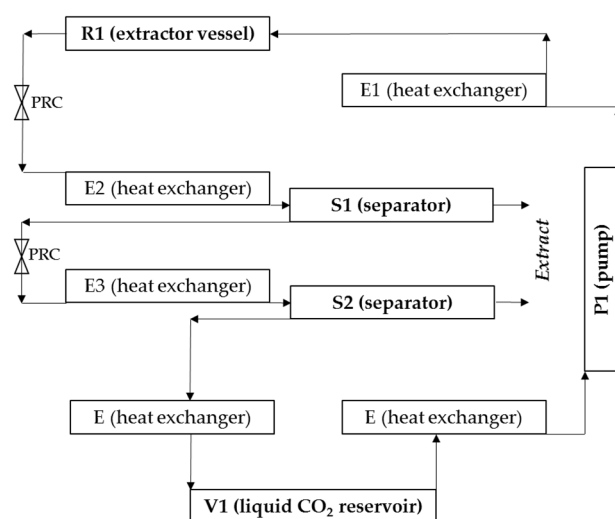

**Figure S8.** Block diagram of in-house built quarter-technical installation used in the study.

**Table S1.** UPLC-MS characteristic of compounds identified in methanol/water extract from blackcurrant seeds residues.

| R <sub>T</sub> [min] | [M-H] <sup>+</sup> (fragments) | Δppm  | Formula                                         | Identified                     | Ref      |
|----------------------|--------------------------------|-------|-------------------------------------------------|--------------------------------|----------|
| 4.49                 | 169.01451 (125)                | 1.55  | C <sub>7</sub> H <sub>6</sub> O <sub>5</sub>    | gallic acid                    | standard |
| 6.00                 | 299.07804 (137)                | 2.66  | C <sub>13</sub> H <sub>16</sub> O <sub>8</sub>  | hydroxybenzoic acid hexoside   | [1]      |
| 6.72                 | 315.07287 (153)                | 2.26  | C <sub>13</sub> H <sub>16</sub> O <sub>9</sub>  | dihydroxybenzoic acid hexoside | [1,2]    |
| 7.99                 | 153.02004                      | 4.60  | C <sub>7</sub> H <sub>6</sub> O <sub>4</sub>    | protocatechuic acid            | standard |
| 10.82                | 137.02490                      | 3.49  | C <sub>7</sub> H <sub>6</sub> O <sub>3</sub>    | p-hydroxybenzoic acid          | standard |
| 15.75                | 197.03510                      | 0.65  | C <sub>9</sub> H <sub>8</sub> O <sub>4</sub>    | caffeic acid                   | standard |
| 19.15                | 593.15321 (285)                | 3.39  | C <sub>27</sub> H <sub>30</sub> O <sub>15</sub> | Cyanidin rutoside              | [3]      |
| 24.76                | 137.02477                      | 2.55  | C <sub>7</sub> H <sub>6</sub> O <sub>3</sub>    | Salicylic acid                 | standard |
| 25.68                | 625.14334 (316)                | 3.70  | C <sub>27</sub> H <sub>30</sub> O <sub>17</sub> | Myricetin rhamnosylhexoside    | [2]      |
| 26.24                | 479.08462 (316)                | 3.14  | C <sub>21</sub> H <sub>20</sub> O <sub>13</sub> | Myricetin 3-O-galactoside      | standard |
| 29.85                | 447.09265 (285)                | -1.42 | C <sub>21</sub> H <sub>20</sub> O <sub>11</sub> | Kaempferol hexoside            | [1]      |
| 31.57                | 609.14881                      | 4.43  | C <sub>27</sub> H <sub>30</sub> O <sub>16</sub> | Quercetin rutoside             | standard |
| 32.51                | 463.09022 (300)                | 4.35  | C <sub>21</sub> H <sub>20</sub> O <sub>12</sub> | Quercetin 3-glucoside          | standard |
| 37.42                | 593.15261 (285)                | 2.38  | C <sub>27</sub> H <sub>30</sub> O <sub>15</sub> | Kaempferol-3-rutinoside        | standard |
| 38.29                | 447.09391 (285)                | 1.39  | C <sub>21</sub> H <sub>20</sub> O <sub>11</sub> | Kaempferol glucoside           | standard |
| 49.10                | 301.03681                      | 4.75  | C <sub>15</sub> H <sub>10</sub> O <sub>7</sub>  | Quercetin                      | standard |
| 56.51                | 285.04069                      | 0.8   | C <sub>15</sub> H <sub>10</sub> O <sub>6</sub>  | Kaempferol                     | standard |

1. Zhao, Y.; Lu, H.; Wang, Q.; Liu H.; Shen H.; Xu W.; Ge J.; He D. Rapid qualitative profiling and quantitative analysis of phenolics in *Ribes meyeri* leaves and their antioxidant and antidiabetic activities by HPLC-QTOF-MS/MS and UHPLC-MS/MS. *J. Sep. Sci.* **2021**, *44*, 1404–1420.

2. D'Urso, G.; Montoro, P.; Piacente, S. Detection and comparison of phenolic compounds in different extracts of black currant leaves by liquid chromatography coupled with high-resolution ESI-LTQ-Orbitrap MS and high-sensitivity ESI-Qtrap MS. *J. Pharm. Bio. Anal.*, **2020**, 179, 112926, <https://doi.org/10.1016/j.jpba.2019.112926>
3. Wu, X.; Gu, L.; Prior, R.L.; McKay, S. Characterization of Anthocyanins and Proanthocyanidins in Some Cultivars of Ribes, Aronia, and Sambucus and Their Antioxidant Capacity, *J. Agric. Food Chem.* **2004**, 52, 7846-7856
